# Supplementary material
Source: publisher figshare collection journal article supplement (https://gsajournals.figshare.com/ndownloader/files/14964722)

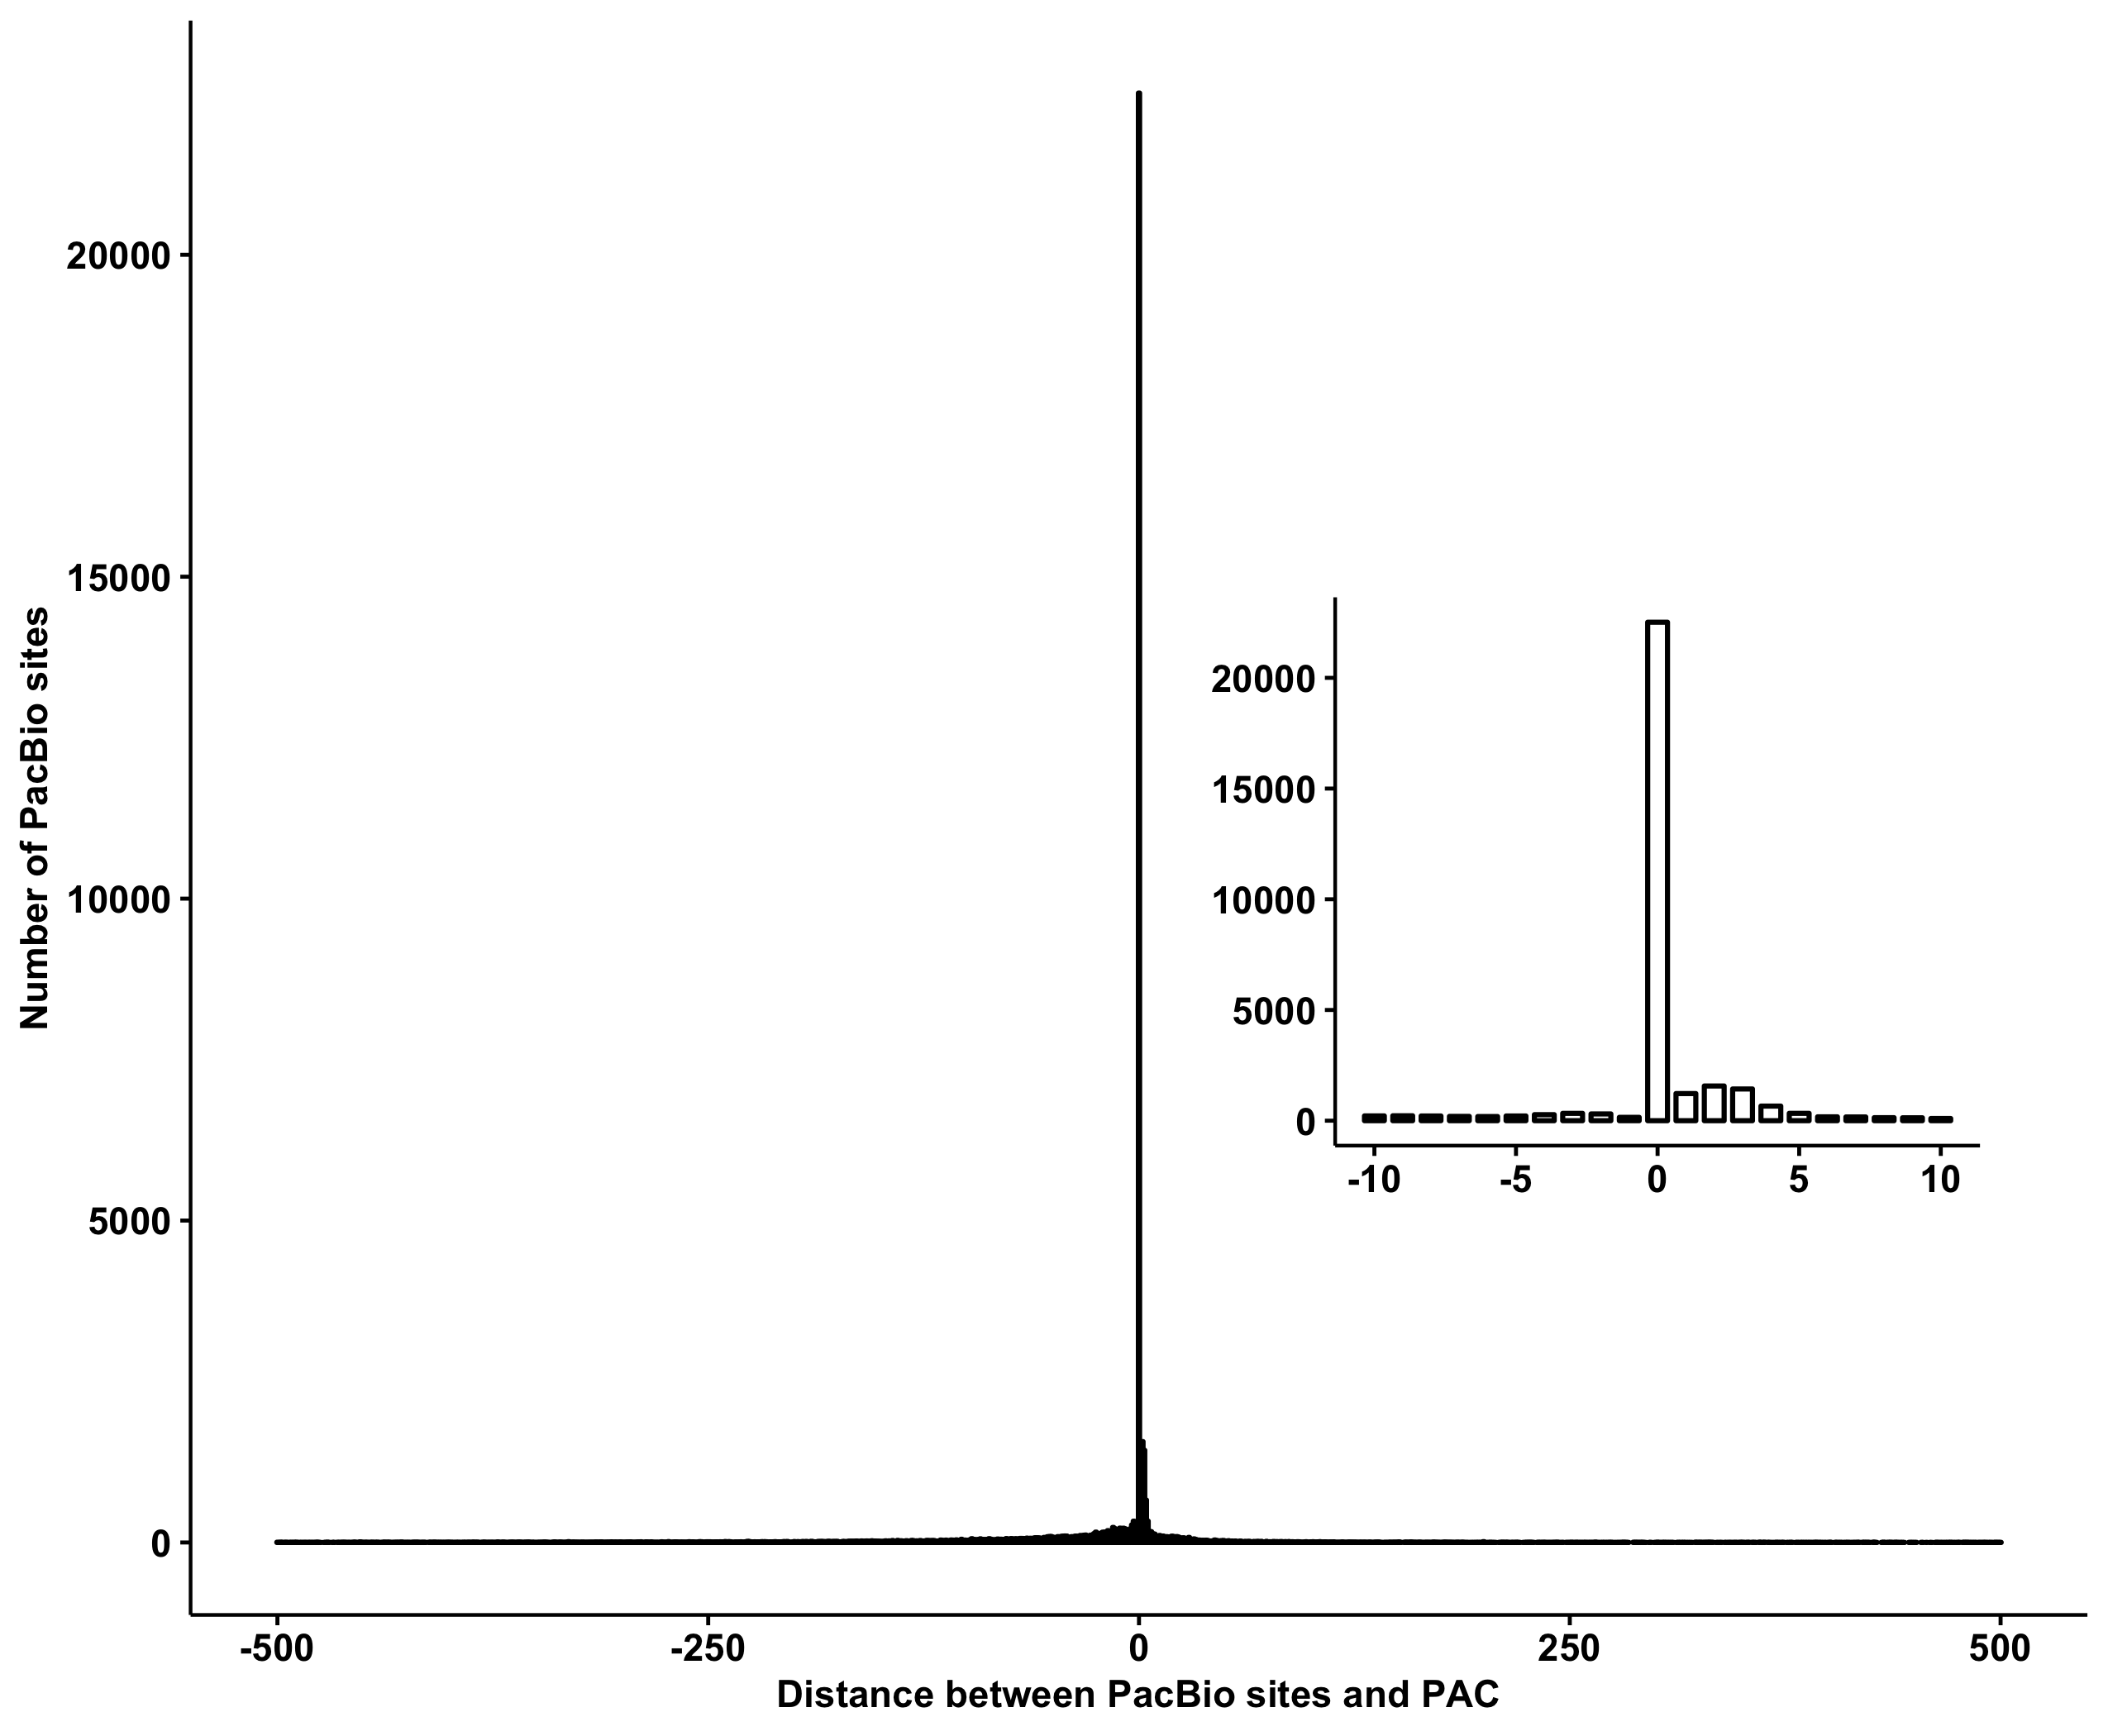


**Figure S1** Most PacBio sites were within the boundaries of the Poly(A) clusters.

Supplement: Supplementary file 1 [file 14964722]
